# Supplementary material for: Invasiveness of pharmacokinetic studies in children: a systematic review
Source: PubMed Central journal article supplement — BMJ Open. 2016 Jul 18;6(7):e010484. doi: 10.1136/bmjopen-2015-010484 (PMC4964204; doi:10.1136/bmjopen-2015-010484), 2016-07-18
Supplement: bmjopen-2015-010484supp_table.pdf [file bmjopen-2015-010484supp_table.pdf]

Supplementary Table 1: Search strategy for Embase 1974 to 2015

| No | Search term                                                                                                                    | Number of study |
|----|--------------------------------------------------------------------------------------------------------------------------------|-----------------|
| 1  | (Preterm neonate* or term neonate* or neonate* or new-born* or child* or children or p*ediatric* or infant*or adolescent*).ti. | 903853          |
| 2  | pharmacokinetic*.ti.                                                                                                           | 74328           |
| 3  | (Blood or plasma or specimen or serum or blood sampling or blood sample*).mp.                                                  | 4775864         |
| 4  | 1 and 2 and 3                                                                                                                  | 3067            |
| 5  | limit 4 to (human and article)                                                                                                 | 2231            |
